# Supplementary material for: Structural and conformational properties of polybenzimidazoles in melt and phosphoric acid solution: a polyelectrolyte membrane for fuel cells
Source: Royal Society of Chemistry journal article supplement (doi:10.1039/c5ra22159e), 2015-12-21
Supplement: c5ra22159e1.pdf [file c5ra22159e1.pdf]

**Structural and Conformational Properties of Polybenzimidazoles in Melt and Phosphoric  
Acid Solution: A Polyelectrolyte Membrane for Fuel cell**

Swagata Pahari\* and Sudip Roy\*

Physical Chemistry Division, National Chemical Laboratory

Pune – 411008, India

\*Corresponding authors: Swagata Pahari and Sudip Roy

Phone: +91 20 2590 3148

Fax: +912025102615

Email: s.pahari@ncl.res.in, s.roy@ncl.res.in

**Table SI1. Dihedral parameter values for PBI and ABPBI**

| Dihedral        | C <sub>0</sub> (kJ/mol) | C <sub>1</sub> (kJ/mol) | C <sub>2</sub> (kJ/mol) | C <sub>3</sub> (kJ/mol) | C <sub>4</sub> (kJ/mol) | C <sub>5</sub> (kJ/mol) |
|-----------------|-------------------------|-------------------------|-------------------------|-------------------------|-------------------------|-------------------------|
| C-C-C-N (PBI)   | 23.6855                 | 1.5774                  | -40.0972                | -1.2647                 | 17.7090                 | 0.9971                  |
| C-C-C-C (PBI)   | 9.1038                  | -0.1848                 | -35.7188                | -1.8278                 | 35.7281                 | 1.8779                  |
| C-C-C-N (ABPBI) | 19.3584                 | 2.6036                  | -38.1289                | -0.6441                 | 17.6170                 | 0.6493                  |

**Table SI2. Bonded force field parameters for PBI**

| Bond description                                                | b <sub>0</sub> (nm) | K <sub>b</sub> (kJ/mol/nm <sup>2</sup> ) |
|-----------------------------------------------------------------|---------------------|------------------------------------------|
| C <sub>benzene</sub> -C <sub>benzene</sub>                      | 0.140               | 392459.2                                 |
| C <sub>benzene</sub> -N <sub>attached with hydrogen</sub>       | 0.138               | 357313.6                                 |
| C <sub>benzene</sub> -N <sub>without hydrogen</sub>             | 0.139               | 346435.2                                 |
| C <sub>benzene</sub> -H <sub>benzene</sub>                      | 0.108               | 307105.6                                 |
| N <sub>attached with hydrogen</sub> -H                          | 0.101               | 363171.2                                 |
| C <sub>benzimidazole</sub> -H <sub>terminal</sub>               | 0.108               | 307105.6                                 |
| C <sub>benzimidazole</sub> -N <sub>attached with hydrogen</sub> | 0.134               | 399153.6                                 |
| C <sub>benzimidazole</sub> -N <sub>without hydrogen</sub>       | 0.133               | 408358.4                                 |
| C <sub>benzimidazole</sub> -C <sub>benzene</sub>                | 0.140               | 392459.2                                 |

| Angle description                                                                                    | $\theta_0$ (nm) | $K_0$ (kJ/mol/rad <sup>2</sup> ) |
|------------------------------------------------------------------------------------------------------|-----------------|----------------------------------|
| C <sub>benzene</sub> -C <sub>benzene</sub> -C <sub>benzene</sub>                                     | 120.00          | 527.184                          |
| C <sub>benzene</sub> -C <sub>benzene</sub> -C <sub>benzimidazole</sub>                               | 120.00          | 527.184                          |
| C <sub>benzene</sub> -C <sub>benzene</sub> -N <sub>attached with hydrogen</sub>                      | 108.70          | 585.760                          |
| C <sub>benzene</sub> -C <sub>benzene</sub> -N <sub>without hydrogen</sub>                            | 108.70          | 585.760                          |
| C <sub>benzene</sub> -N <sub>attached with hydrogen</sub> -C <sub>benzimidazole</sub>                | 109.80          | 585.760                          |
| C <sub>benzene</sub> -N <sub>without hydrogen</sub> -C <sub>benzimidazole</sub>                      | 109.80          | 585.760                          |
| N <sub>attached with hydrogen</sub> -C <sub>benzimidazole</sub> -N <sub>without hydrogen</sub>       | 120.00          | 585.760                          |
| C <sub>benzene</sub> -C <sub>benzene</sub> -H <sub>benzene</sub>                                     | 120.00          | 292.880                          |
| C <sub>benzene</sub> -N <sub>attached with hydrogen</sub> -H <sub>attached with nitrogen</sub>       | 118.00          | 292.880                          |
| C <sub>benzimidazole</sub> -N <sub>attached with hydrogen</sub> -H <sub>attached with nitrogen</sub> | 120.00          | 292.880                          |
| N <sub>attached with hydrogen</sub> -C <sub>benzimidazole</sub> -H <sub>terminal</sub>               | 120.00          | 292.880                          |
| N <sub>without hydrogen</sub> -C <sub>benzimidazole</sub> -H <sub>terminal</sub>                     | 120.00          | 292.880                          |

**Table SI3: Charges for the atoms of PBI. See Figure SI2 for atom numbers.**

| <b>Atom number</b> | <b>Atom name</b> | <b>Charge</b> | <b>Atom number</b> | <b>Atom name</b> | <b>Charge</b> |
|--------------------|------------------|---------------|--------------------|------------------|---------------|
| 1                  | H                | 0.00          | 20                 | C                | -0.04         |
| 2                  | C                | 0.35          | 21                 | H                | 0.20          |
| 3                  | N                | -0.49         | 22                 | C                | -0.17         |
| 4                  | C                | -0.09         | 23                 | H                | 0.20          |
| 5                  | C                | 0.40          | 24                 | N                | -0.51         |
| 6                  | N                | -0.95         | 25                 | C                | 0.46          |
| 7                  | H                | 0.40          | 26                 | N                | -1.03         |
| 8                  | C                | -0.04         | 27                 | H                | 0.40          |
| 9                  | H                | 0.20          | 28                 | C                | 0.08          |
| 10                 | C                | -0.04         | 29                 | C                | -0.11         |
| 11                 | C                | -0.17         | 30                 | H                | 0.17          |
| 12                 | H                | 0.20          | 31                 | C                | -0.17         |
| 13                 | C                | -0.02         | 32                 | H                | 0.17          |
| 14                 | H                | 0.18          | 33                 | C                | -0.12         |
| 15                 | C                | -0.04         | 34                 | C                | -0.16         |
| 16                 | C                | -0.04         | 35                 | H                | 0.18          |
| 17                 | H                | 0.19          | 36                 | C                | -0.10         |
| 18                 | C                | 0.39          | 37                 | H                | 0.21          |
| 19                 | C                | -0.09         | 38                 | H                | 0.00          |

**Table SI4: Charges for the atoms of ABPBI. See Figure SI3 for atom numbers.**

| Atom number | Atom name | Charge | Atom number | Atom name | Charge |
|-------------|-----------|--------|-------------|-----------|--------|
| 1           | H         | 0.00   | 9           | C         | -0.27  |
| 2           | C         | -0.15  | 10          | H         | 0.16   |
| 3           | C         | -0.05  | 11          | N         | -0.77  |
| 4           | H         | 0.11   | 12          | C         | 0.72   |
| 5           | C         | -0.33  | 13          | N         | -0.74  |
| 6           | H         | 0.18   | 14          | H         | 0.43   |
| 7           | C         | 0.30   | 15          | H         | 0.00   |
| 8           | C         | 0.41   |             |           |        |

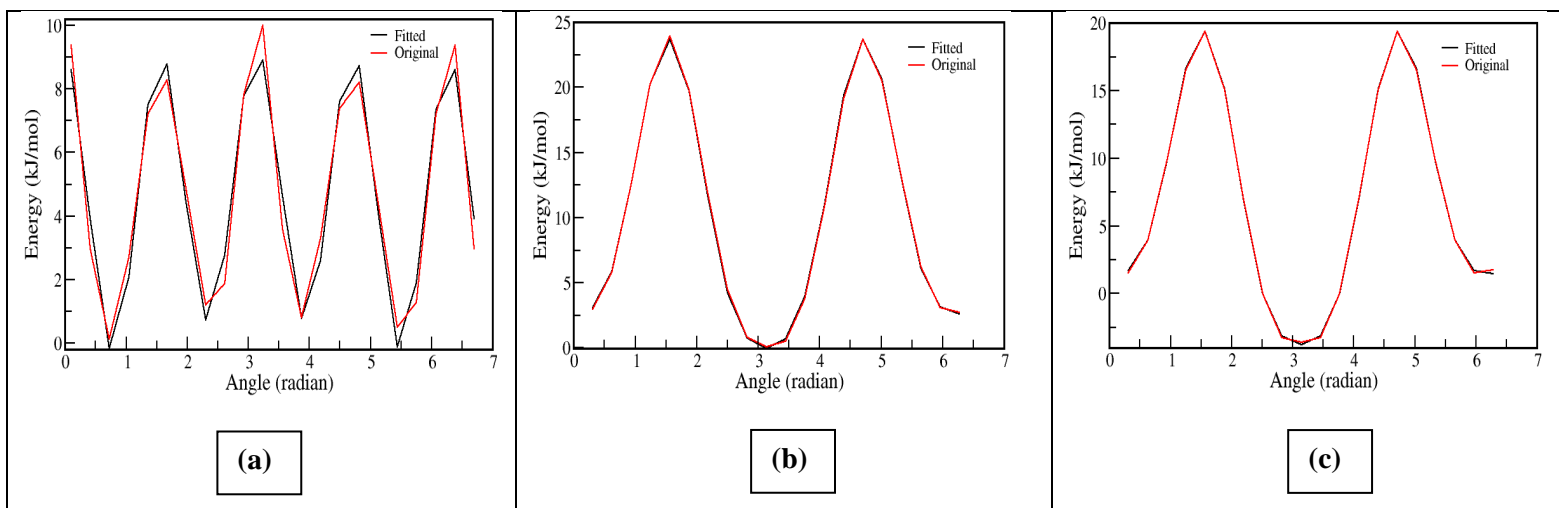

**Figure SI1. Fitting of dihedral potential energy of a)  $C_b-C_b-C_b-C_b$  b)  $C_b-C_b-C_{im}-N_{im}$  dihedral for PBI and c)  $C_b-C_b-C_{im}-N_{im}$  for ABPBI**

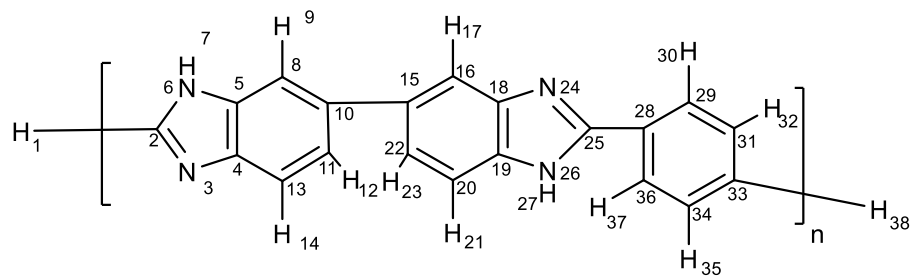

**Figure SI2. Chemical structure of PBI**

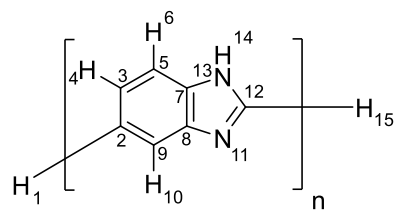

**Figure SI3. Chemical structure of ABPBI**
